# Supplementary material for: Tungsten and molybdenum incomplete cuboidal clusters; kinetico-mechanistic studies and association in dimers
Source: Royal Society of Chemistry journal article supplement (doi:10.1039/c3dt51101d), 2013-01-01
Supplement: c3dt51101d.pdf [file c3dt51101d.pdf]

**Supplementary Information**

**Table S1.-** Values of  $k$  obtained for the fluxional process observed for the two  $\eta^2$ -dtp ligands of the two locked positions of species  $[\text{Mo}_3\text{S}_4(\eta^2\text{-dtp})_3(\eta^2(\mu)\text{-dtp})(\text{pyrazine})]$  in  $\text{CD}_2\text{Cl}_2$  solution at different temperatures.

| T /°C | $k_{\text{obs}} / \text{s}^{-1}$ |
|-------|----------------------------------|
| -30   | 20                               |
| -25   | 37                               |
| -20   | 85                               |
| -10   | 300                              |
| 0     | 800                              |
| 10    | 1700                             |
| 20    | 4500                             |

**Table S2.-** Values of  $k_{\text{obs}}$  obtained for the reactions of the  $[\text{Mo}_3\text{S}_4(\eta^2\text{-dtp})_3(\eta^2(\mu)\text{-dtp})(\text{H}_2\text{O})]$  complex with pyridine in the indicated conditions of solvent and temperature,  $[\text{cluster}] = 2 \times 10^{-5}$  M.

| Solvent            | T /°C   | [py] /M | $k_{\text{obs}} / \text{s}^{-1}$ |         |          |
|--------------------|---------|---------|----------------------------------|---------|----------|
| CHCl <sub>3</sub>  | 15      | 0.00020 | 0.050                            | 0.00058 | 0.000045 |
|                    |         | 0.00040 | 0.072                            | 0.00075 | 0.000090 |
|                    |         | 0.0010  | 0.10                             | 0.00099 | 0.00014  |
|                    |         | 0.0040  | 0.21                             | 0.0017  | 0.00021  |
|                    |         | 0.010   | 0.27                             | 0.0023  | 0.00026  |
|                    | 25      | 0.00020 | 0.14                             |         |          |
|                    |         | 0.00040 | 0.17                             |         |          |
|                    |         | 0.0010  | 0.24                             |         |          |
|                    |         | 0.0040  | 0.39                             |         |          |
|                    |         | 0.010   | 0.49                             |         |          |
| 35                 | 0.00060 | 0.43    |                                  |         |          |
|                    | 0.0013  | 0.52    |                                  |         |          |
|                    | 0.0025  | 0.67    |                                  |         |          |
|                    | 0.0050  | 0.85    |                                  |         |          |
|                    | 0.010   | 0.91    |                                  |         |          |
| CH <sub>3</sub> CN | 25      | 0.00025 | 3.3                              |         |          |
|                    |         | 0.00050 | 3.2                              |         |          |
|                    |         | 0.0010  | 3.5                              |         |          |
|                    |         | 0.0040  | 3.8                              |         |          |
|                    |         | 0.0070  | 4.0                              |         |          |
| CH <sub>3</sub> OH | 25      | 0.0010  | 4.0                              |         |          |
|                    |         | 0.00025 | 3.3                              |         |          |
|                    |         | 0.0005  | 3.4                              |         |          |
|                    |         | 0.0010  | 3.5                              |         |          |
|                    |         | 0.0040  | 3.7                              |         |          |
|                    |         | 0.0070  | 3.8                              |         |          |
|                    |         | 0.010   | 3.9                              |         |          |

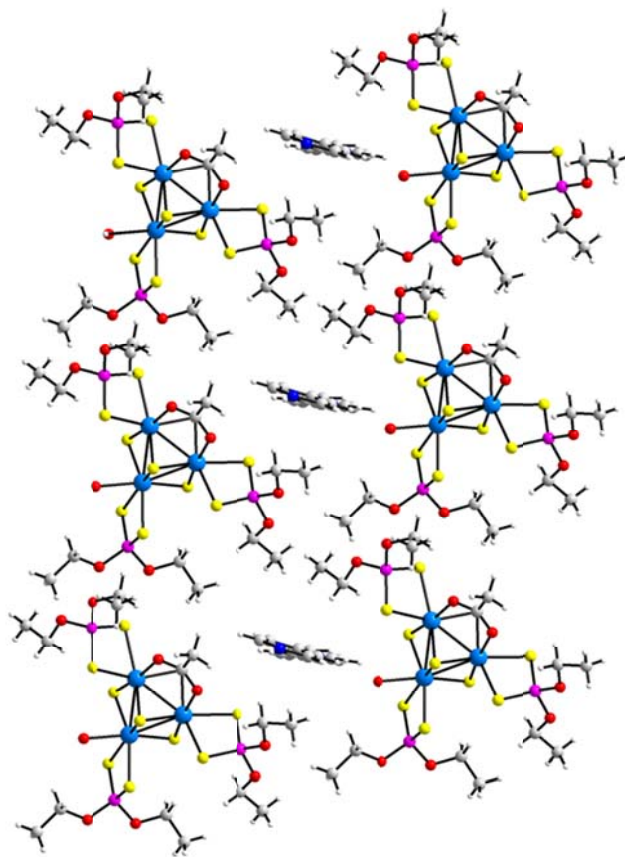

**Figure S1.**- Packing of the trinuclear clusters and the 1,2-bis(pyridyl)ethylene ligand in compound **5**.

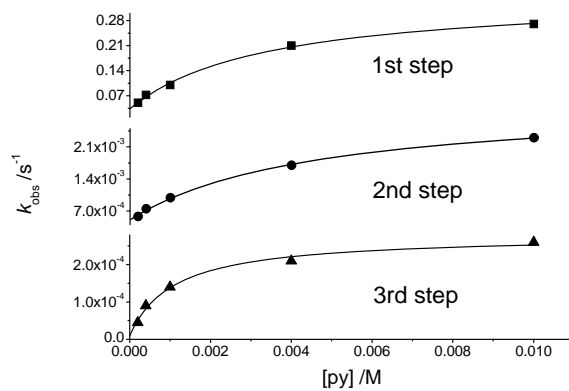

**Figure S2.-** Dependence on the values of [py] of the observed rates constants obtained for the reaction of  $[Mo_3S_4(\eta^2\text{-dtp})_3(\eta^2(\mu)\text{-dtp})(H_2O)]$  with pyridine in chloroform and at 15 °C; [cluster] =  $2 \times 10^{-5}$  M.
